# Supplementary material
Source: PubMed Central journal article supplement (PMC4209926)

Fig S1

**A**

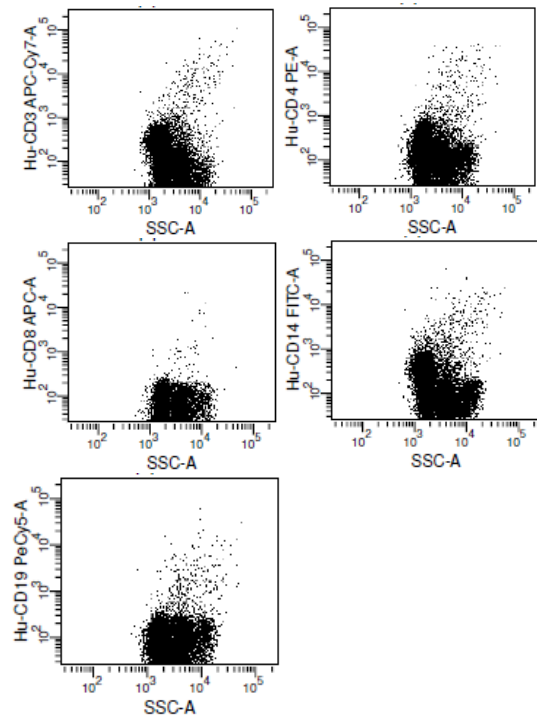

**B**

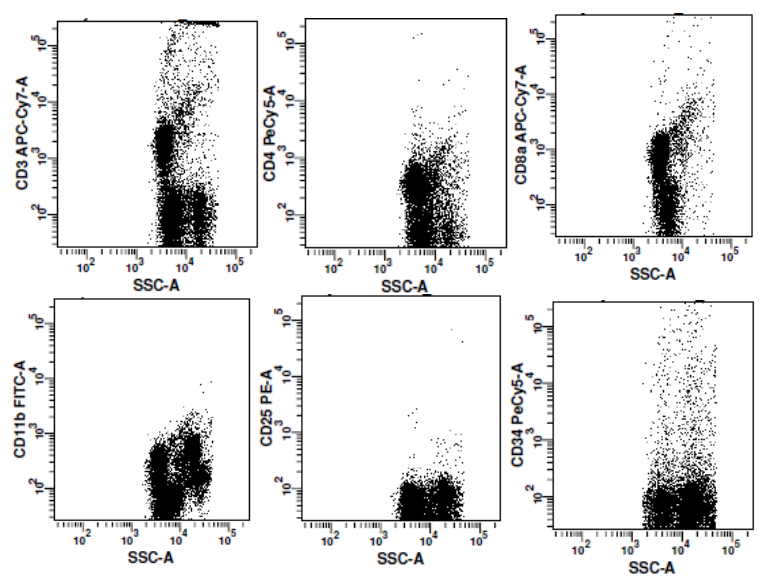

**C**

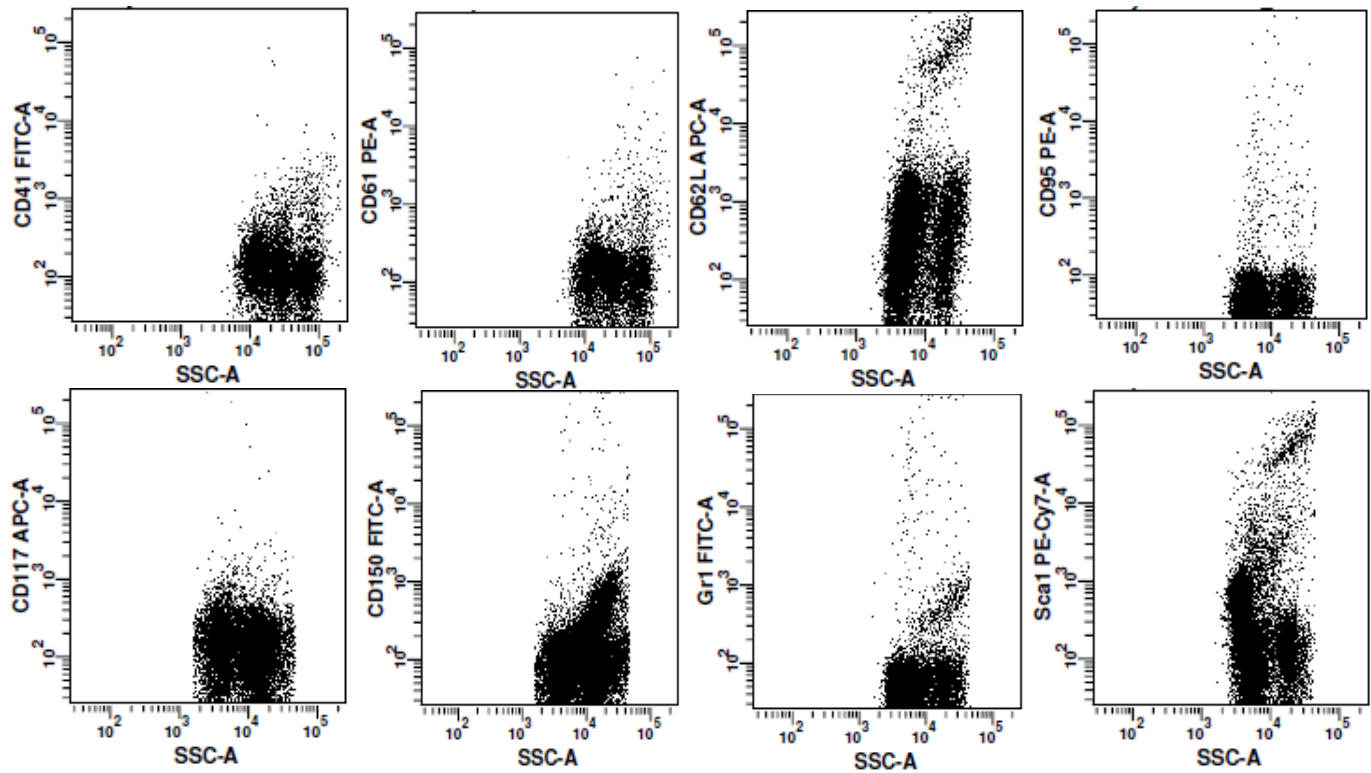

Supplement: iep0095-0342-sd1.pdf [file iep0095-0342-sd1.pdf]
